# Supplementary figures and images for: Punicalagin alleviates renal injury via the gut-kidney axis in high-fat diet-induced diabetic mice
Source: Royal Society of Chemistry journal article supplement (doi:10.1039/d1fo03343c), 2021-12-18

**A**

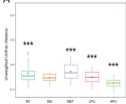

**B**

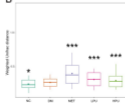

Supplement: d1fo03343c3.pdf [file d1fo03343c3.pdf]

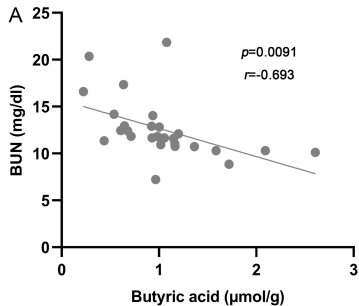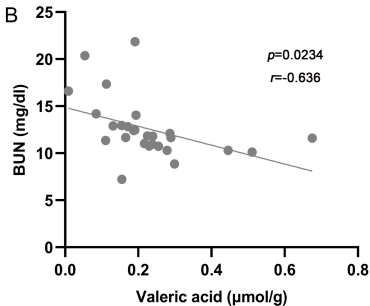

Supplement: d1fo03343c4.pdf [file d1fo03343c4.pdf]

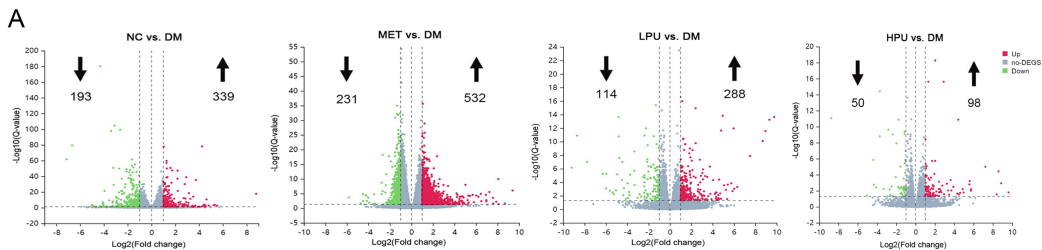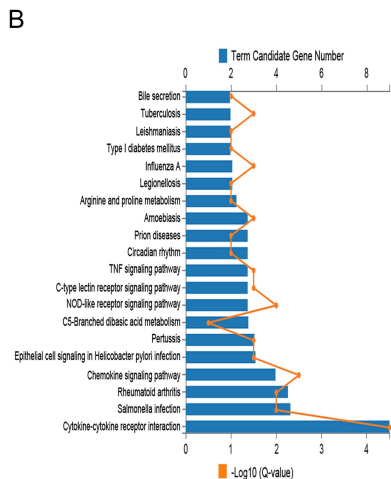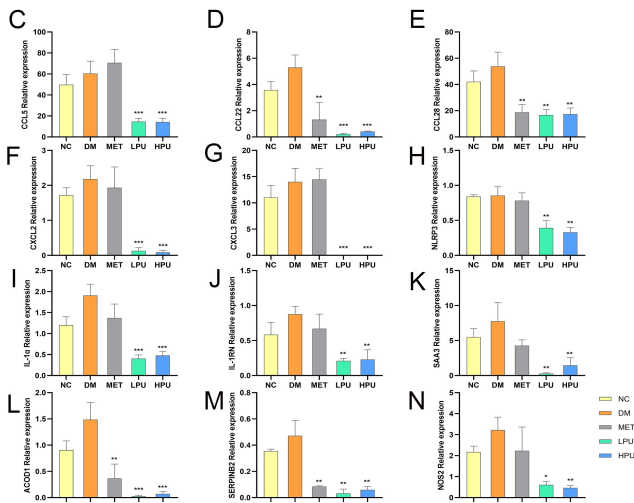

Supplement: d1fo03343c5.pdf [file d1fo03343c5.pdf]
